# Supplementary material for: Aerosol-assisted CVD of cadmium diselenoimidodiphosphinate and formation of a new iPr2N2P3+ ion supported by combined DFT and mass spectrometric studies
Source: Royal Society of Chemistry journal article supplement (doi:10.1039/c6dt03186b), 2016-01-01
Supplement: c6dt03186b1.pdf [file c6dt03186b1.pdf]

Electronic Supplementary Information

**Aerosol-assisted CVD of cadmium diselenoimidodiphosphate and formation of a new  
 $i\text{Pr}_2\text{N}_2\text{P}_3^+$  ion supported by combined DFT and mass spectrometric studies**

Temidayo Oyetunde,<sup>a</sup> Mohammad Afzaal,<sup>b</sup> M. A. Vincent,<sup>c</sup> and Paul O'Brien\*<sup>d</sup>.

<sup>a</sup>Department of Chemical Sciences, College of Natural Sciences, Redeemer's University, Ede, Osun State, Nigeria.

<sup>b</sup>Materials and Physics Research Centre, University of Salford, M5 4WT, Manchester, United Kingdom.

<sup>c</sup>School of Chemistry, The University of Manchester, Oxford Road, M13 9PL, Manchester, United Kingdom.

<sup>d</sup>School of Chemistry and School of Materials, The University of Manchester, Oxford Road, M13 9PL, Manchester, United Kingdom.

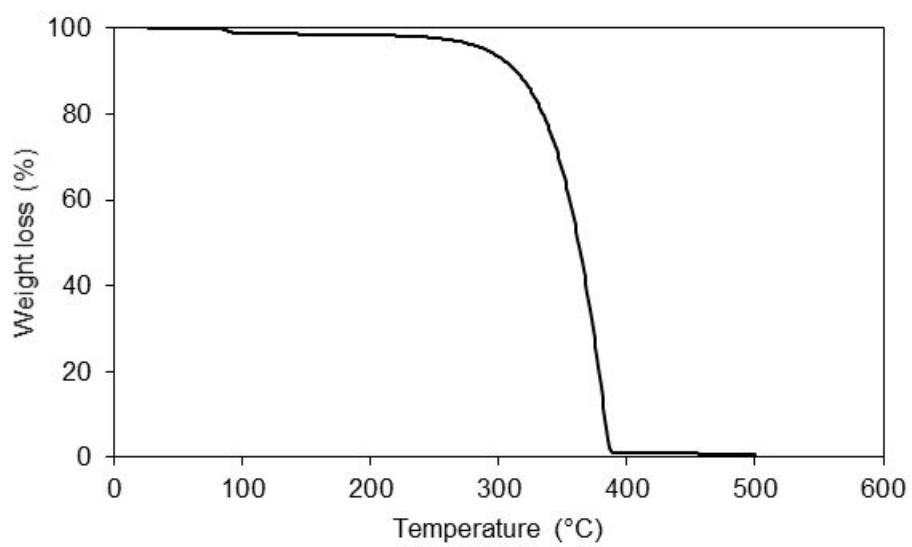

**Fig. S1** Thermogravimetry analysis of Cd[(SeP<sup>i</sup>Pr<sub>2</sub>)<sub>2</sub>N]<sub>2</sub>.

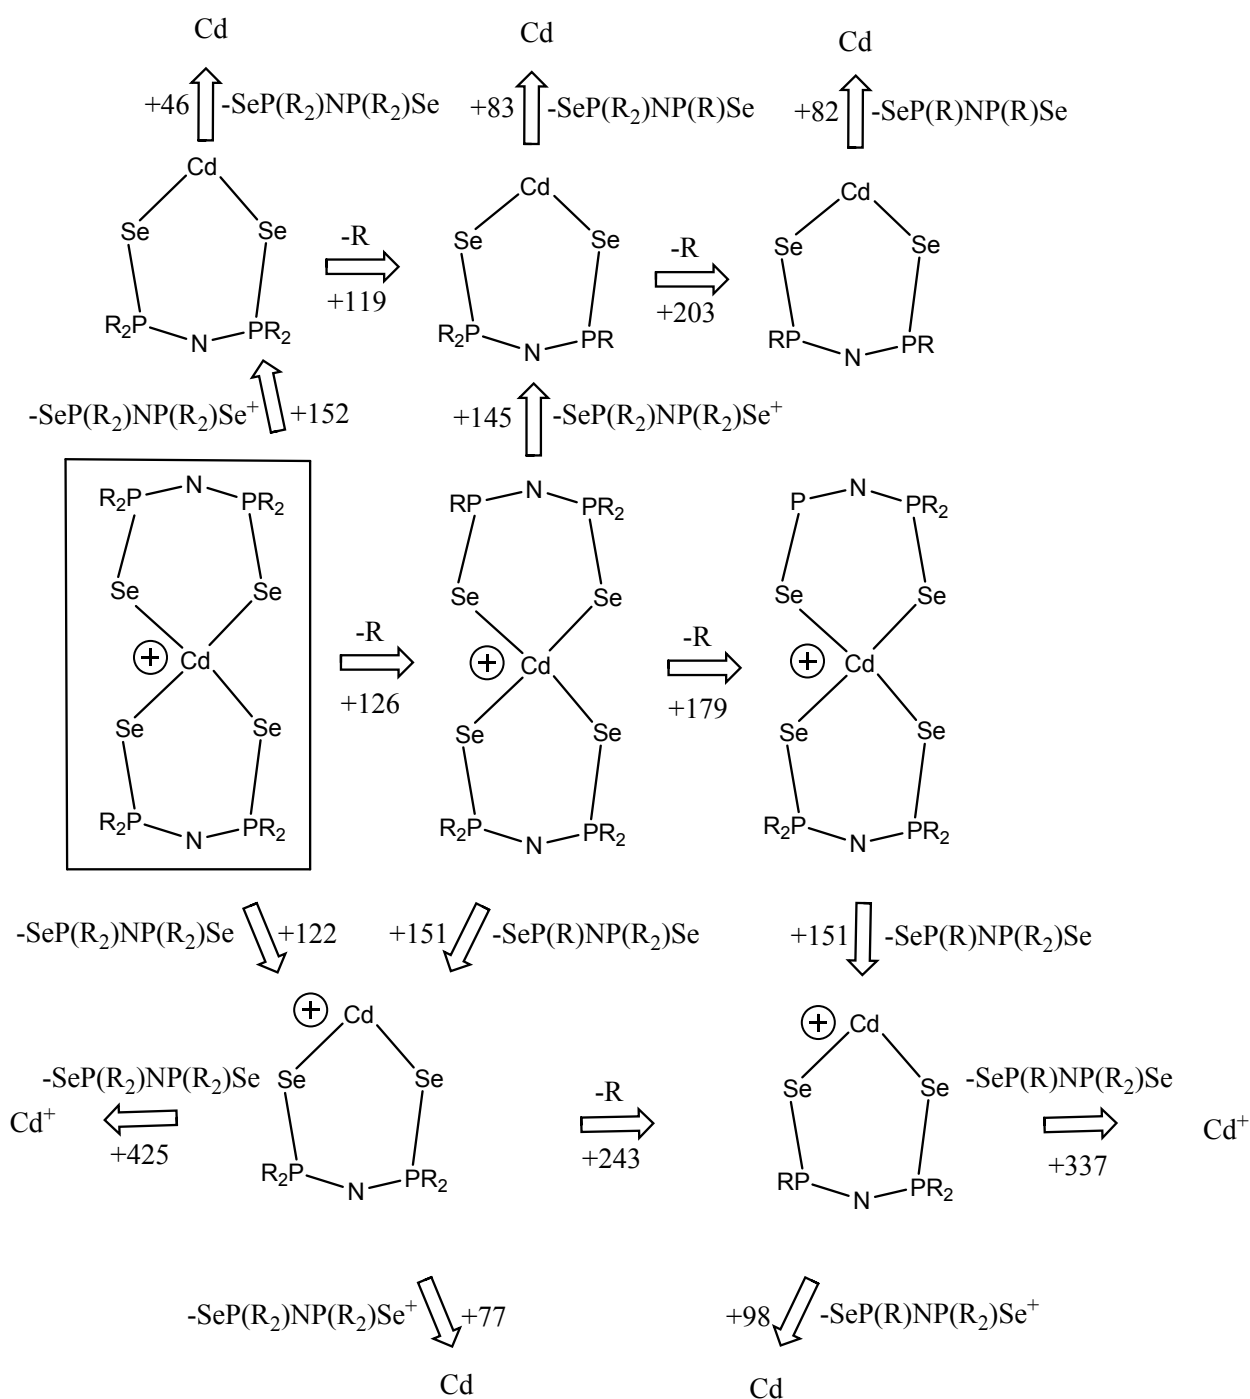

**Fig. S2** The predicted breakdown of the ion  $\text{Cd}(\text{SeP(R}_2\text{)-N-P(R}_2\text{)Se})_2^+$ . Relative free energies are given in  $\text{kJ mol}^{-1}$ .

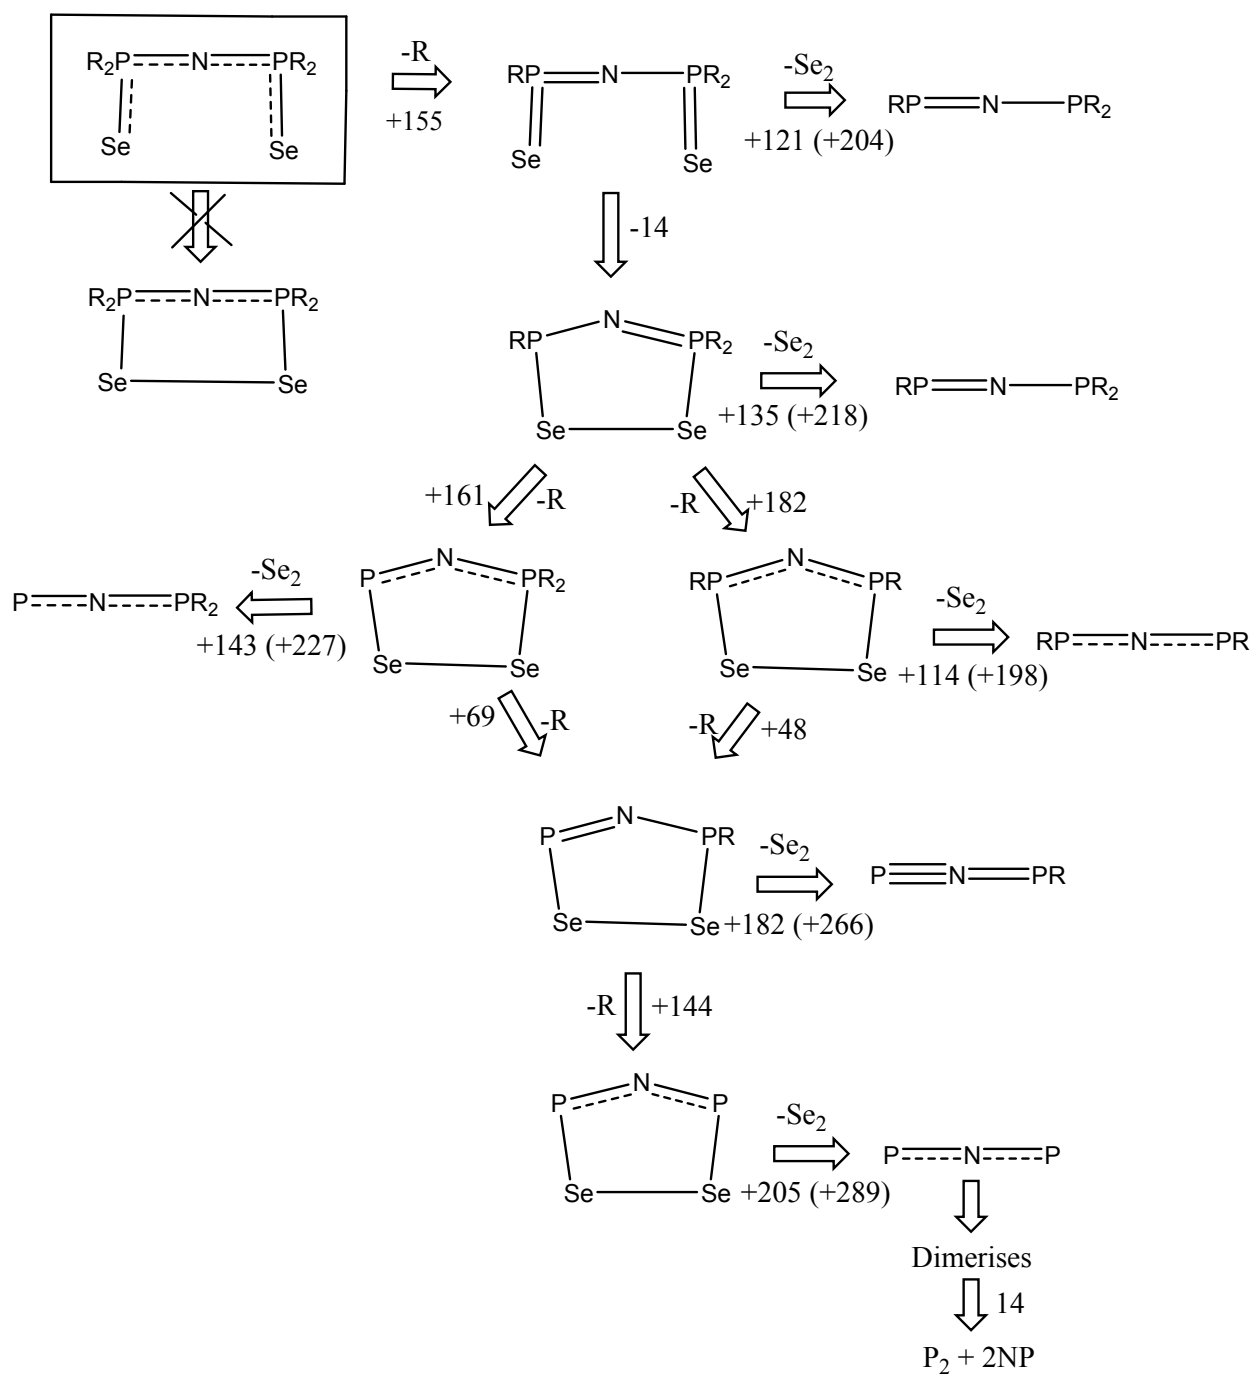

**Fig. S3** The predicted breakdown of the neutral ligand. For loss of  $Se_2$  two values are given the first being for the triplet dimer and the second (in brackets) for the singlet dimer. Relative free energies are given in  $kJ\ mol^{-1}$ .

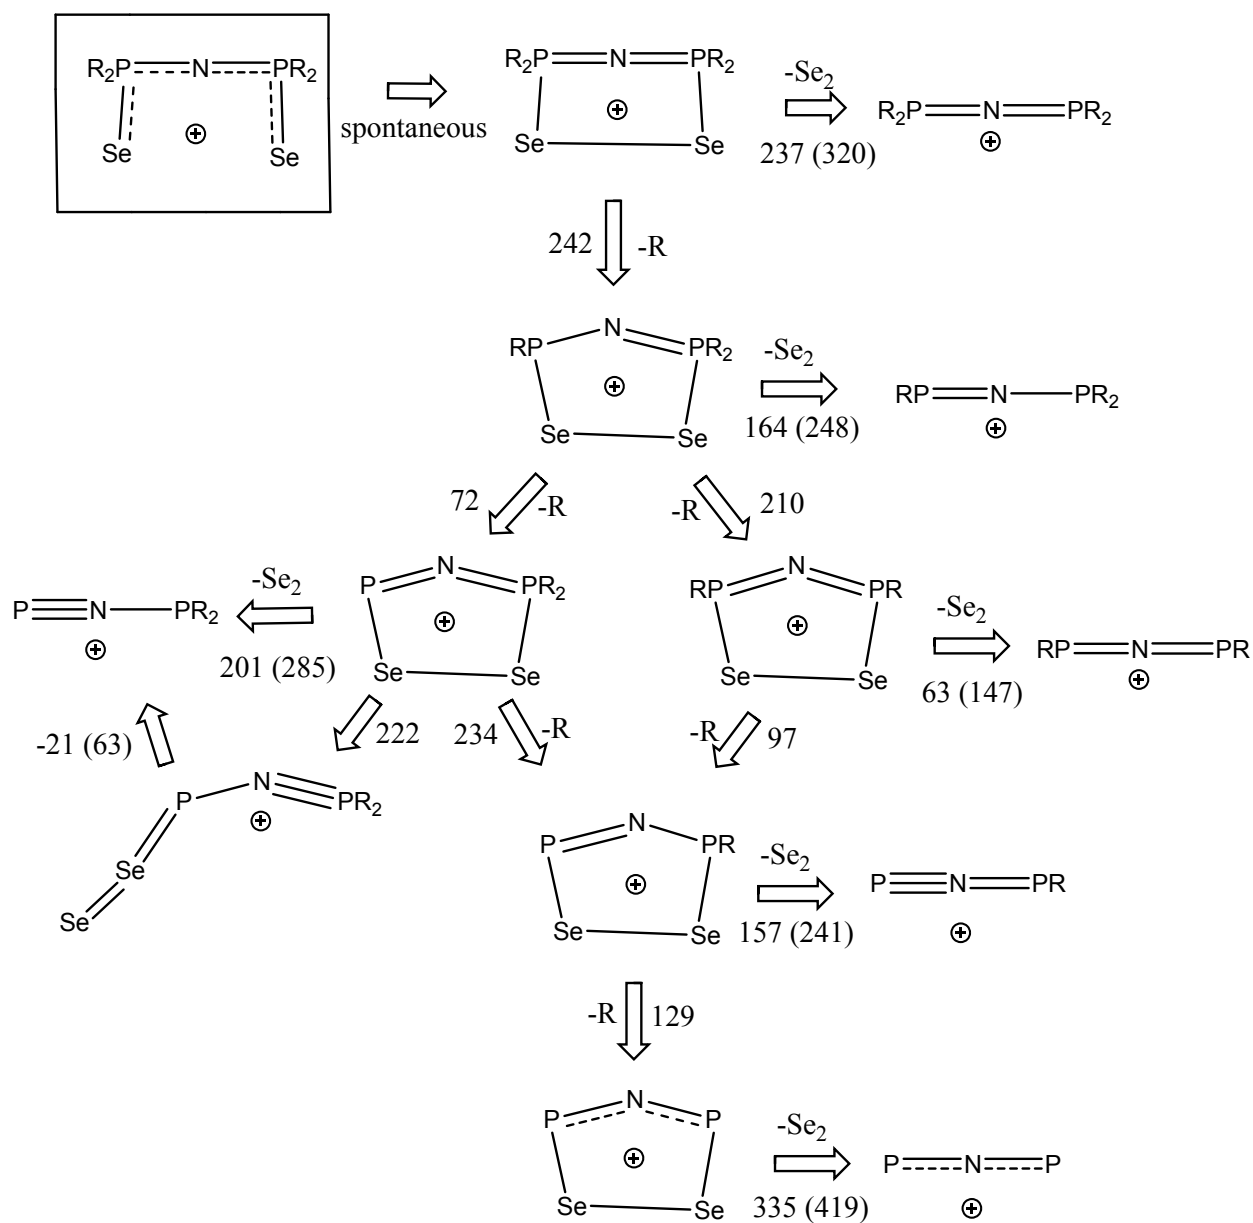

**Fig. S4** The predicted breakdown of the positive ligand. For loss of  $Se_2$  two values are given the first being for the triplet dimer and the second (in brackets) for the singlet dimer. Relative free energies are given in  $\text{kJ mol}^{-1}$ .

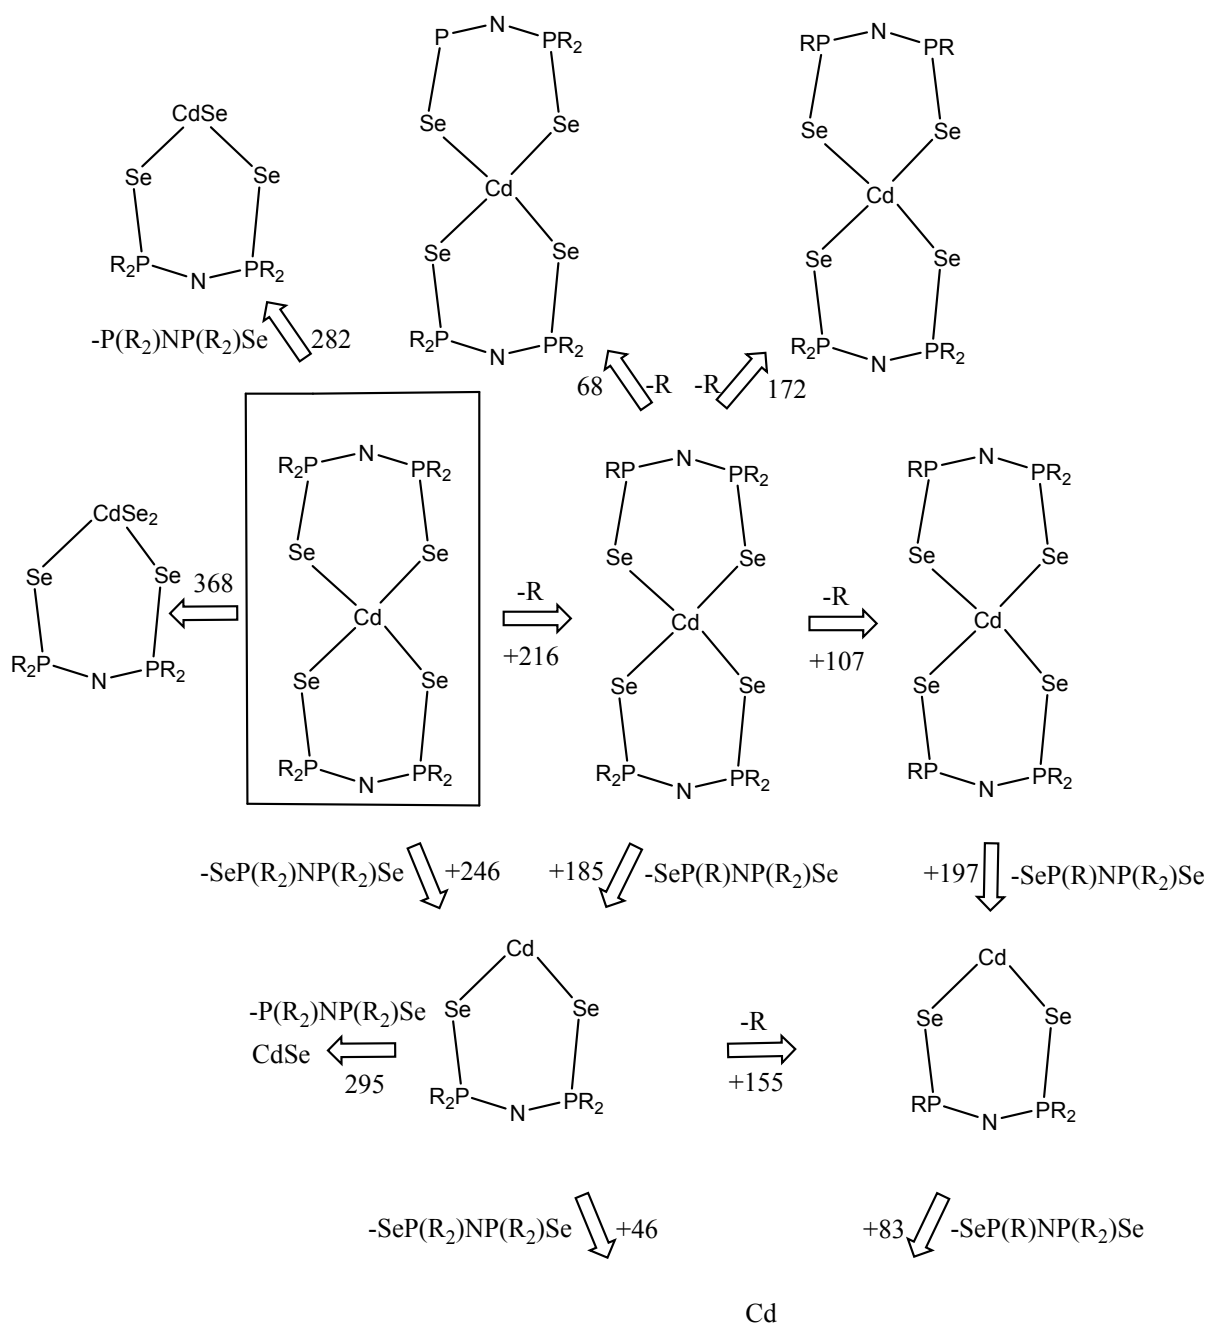

**Fig. S5** The predicted breakdown of neutral complex (part I). Relative free energies are given in  $\text{kJ mol}^{-1}$ .

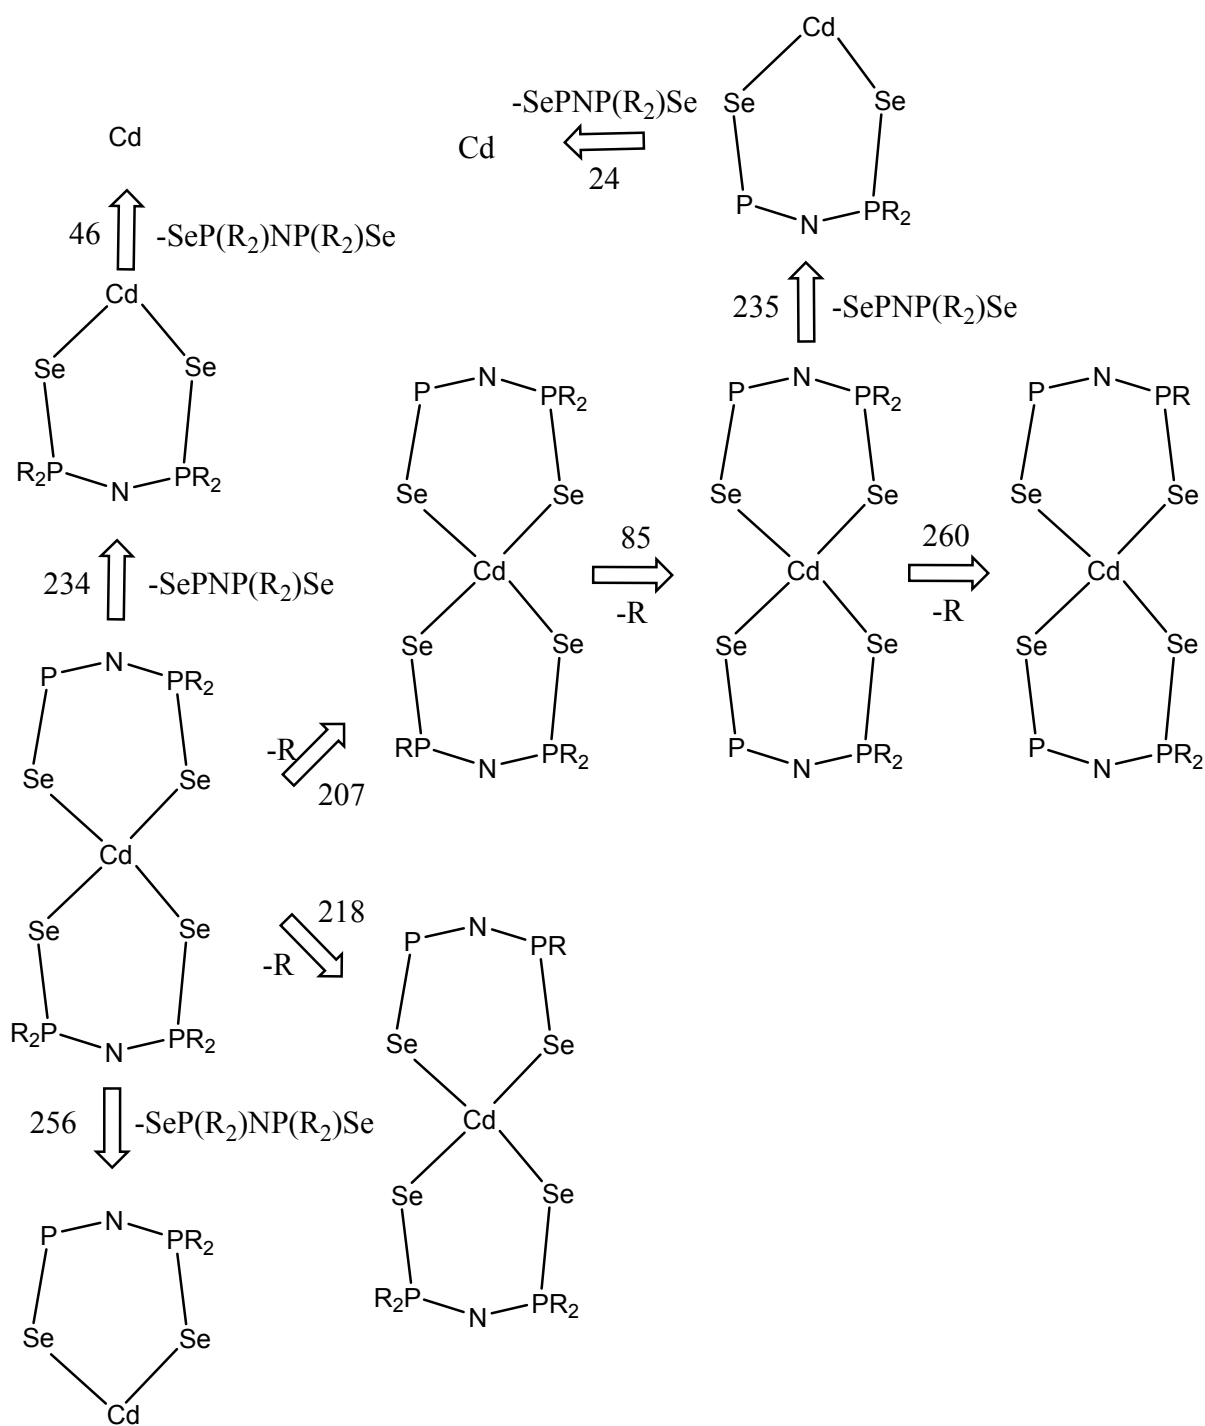

**Fig. S6** The predicted breakdown of neutral complex (part II). Relative free energies are given in  $\text{kJ mol}^{-1}$ .
